# Supplementary material
Source: ML conference proceedings conference paper supplement (https://openreview.net/forum?id=AqN23oqraW)

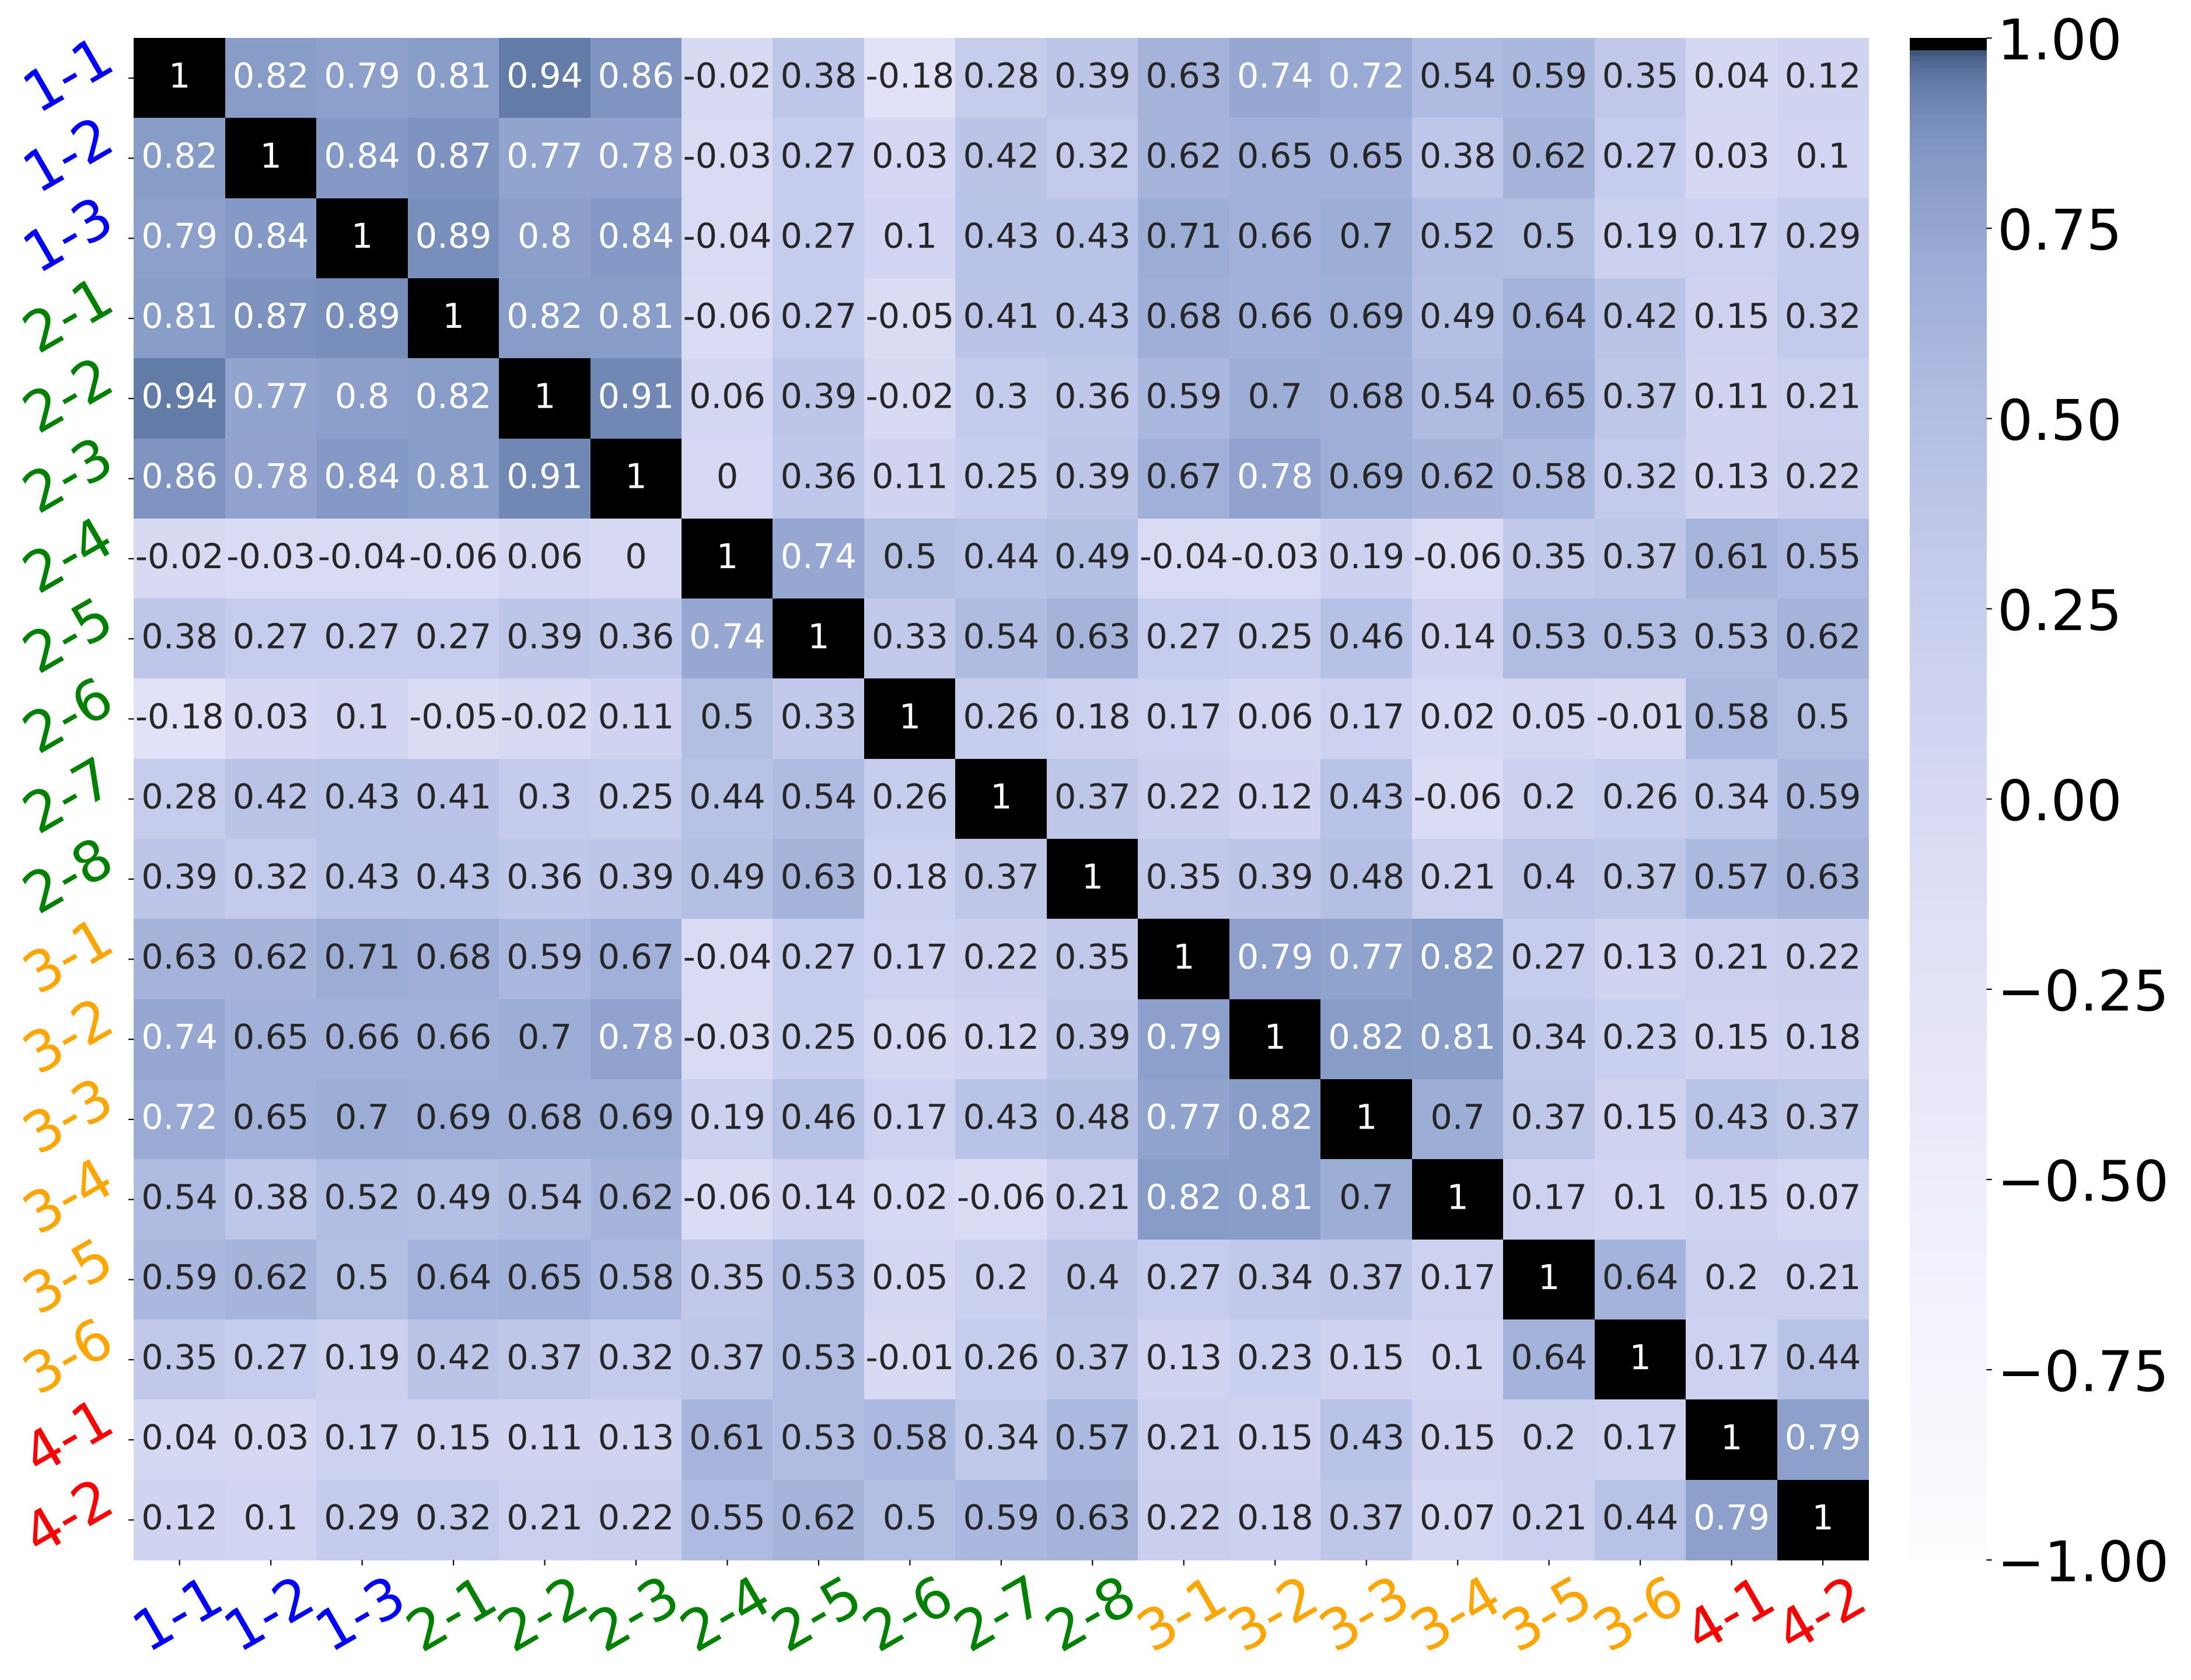

Supplement: supplementary_material [file attachment]

level-1: KM

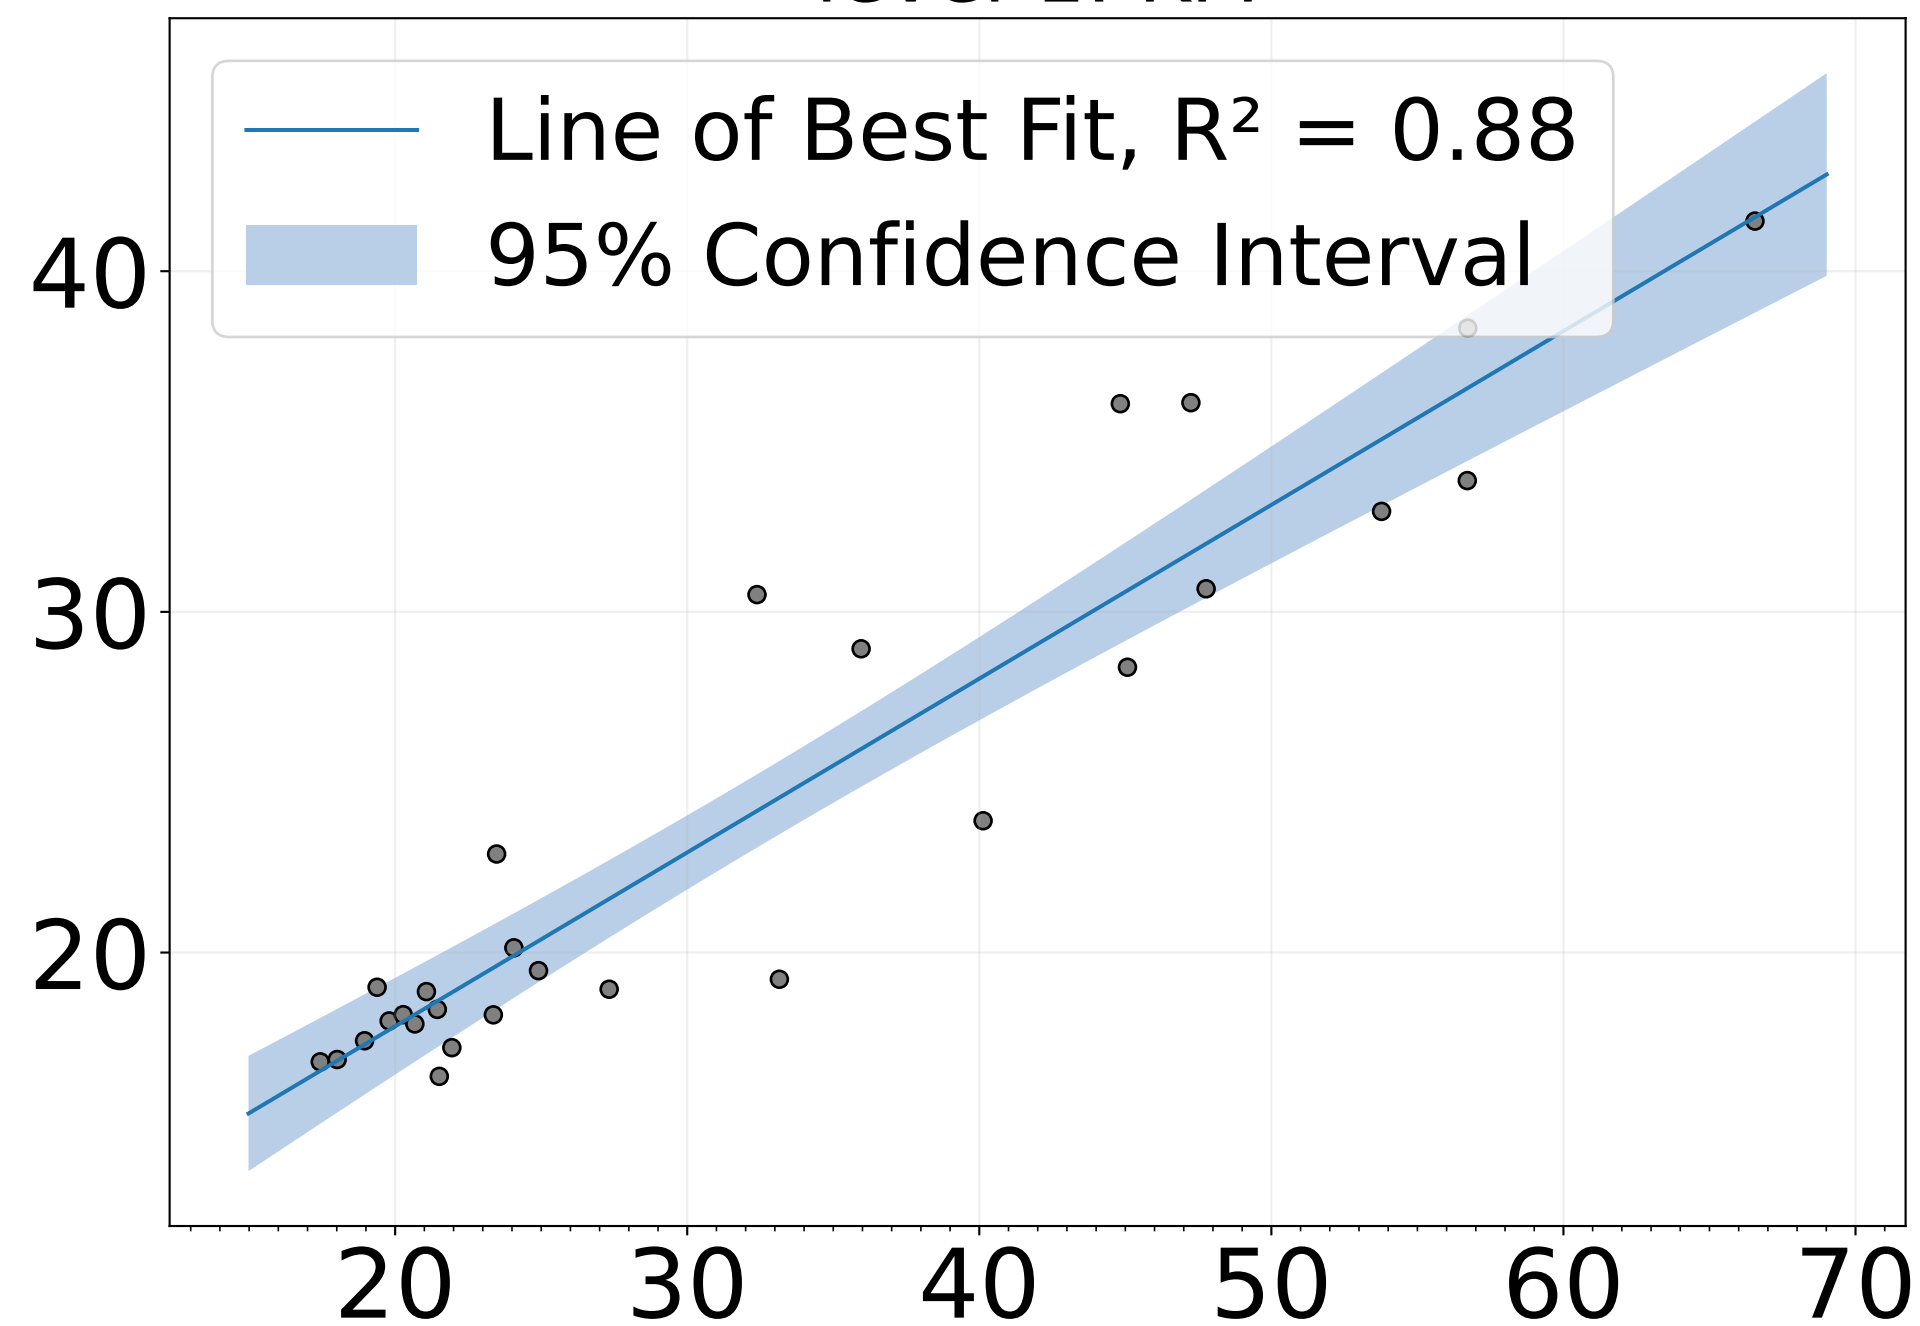

level-2: KU

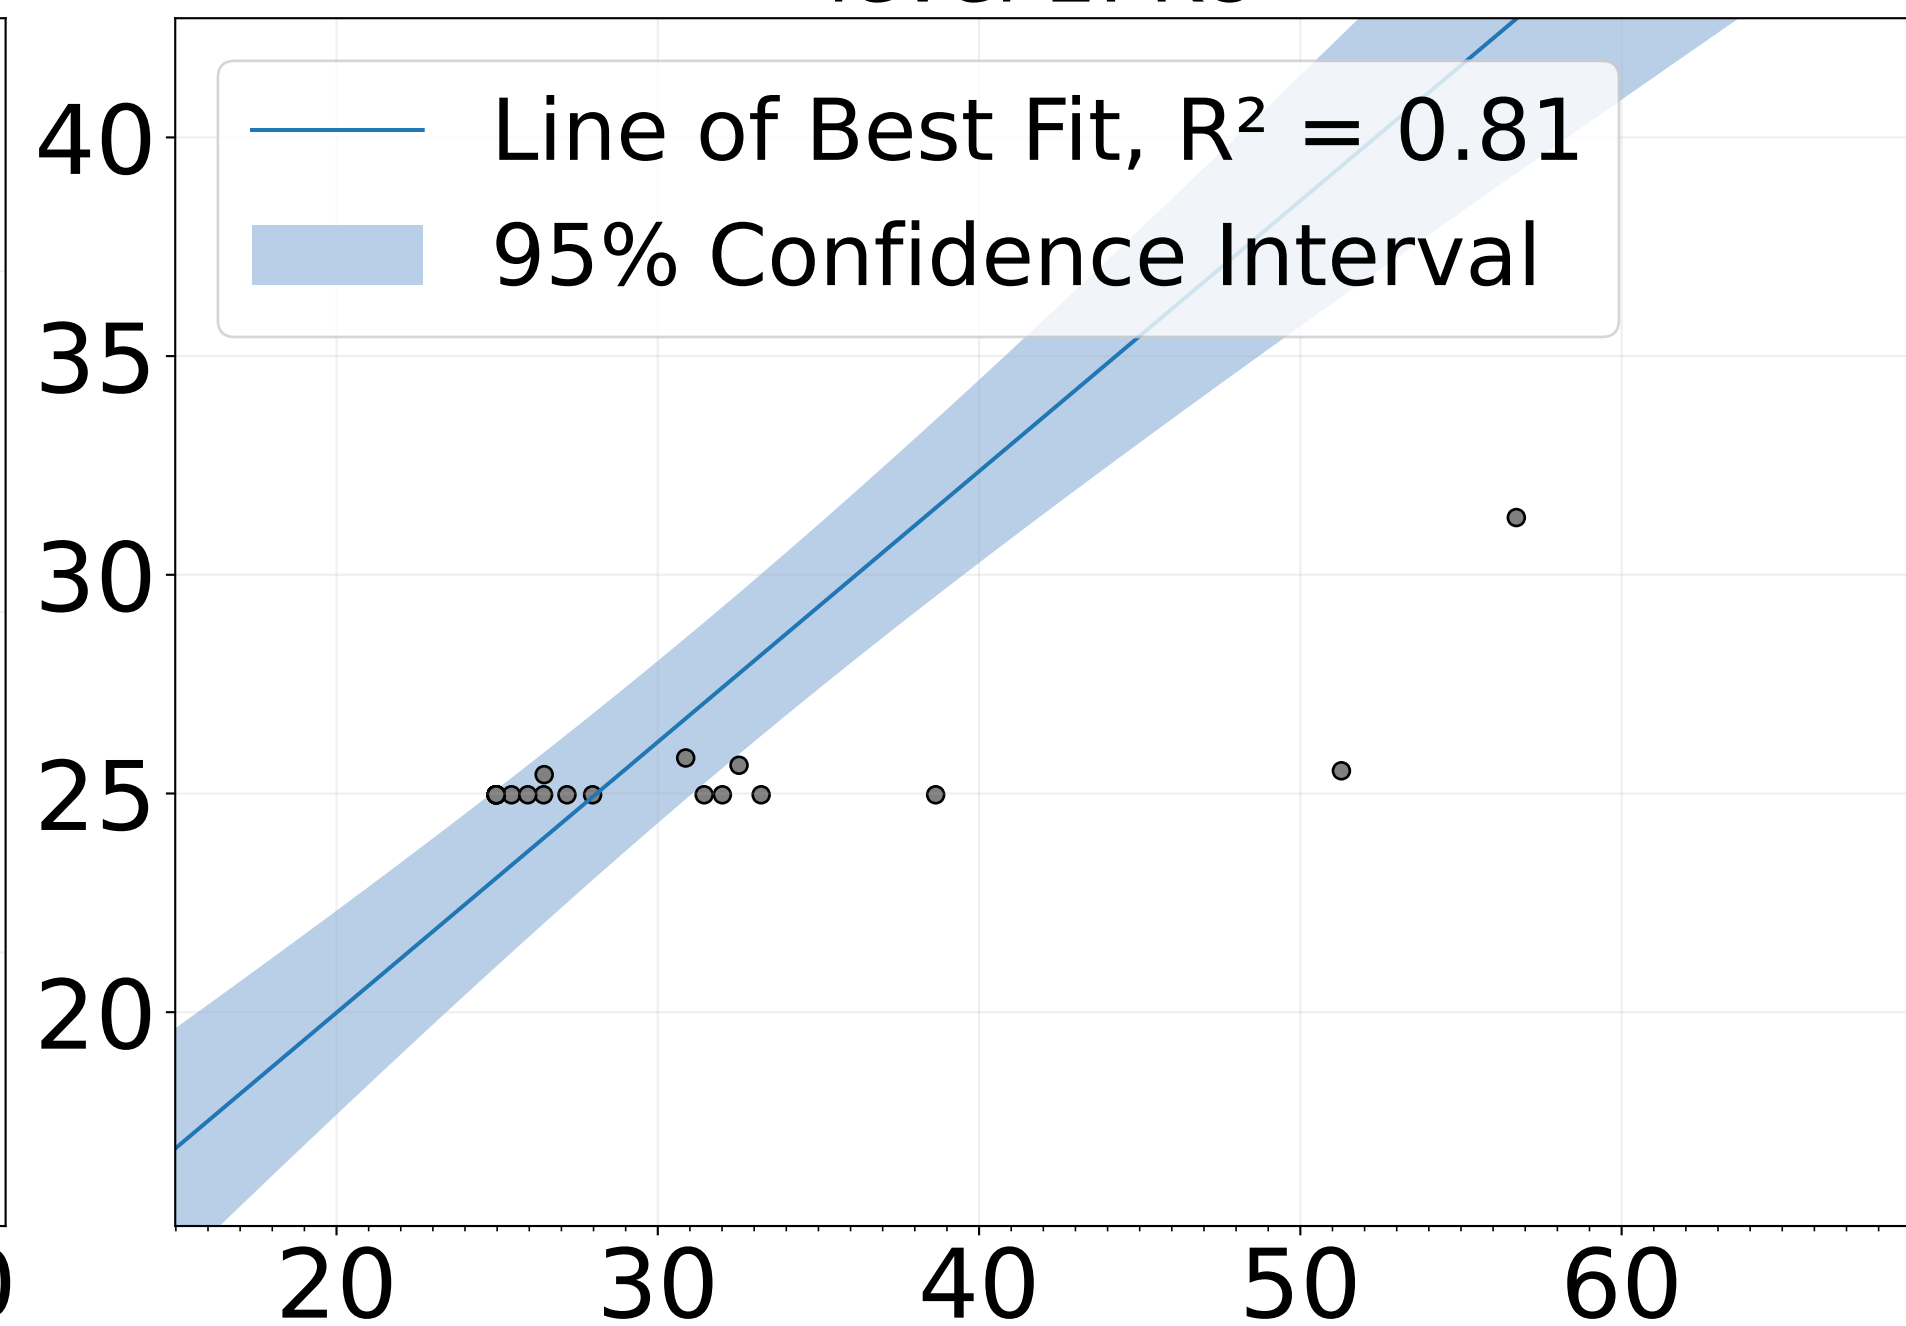

level-3: KA

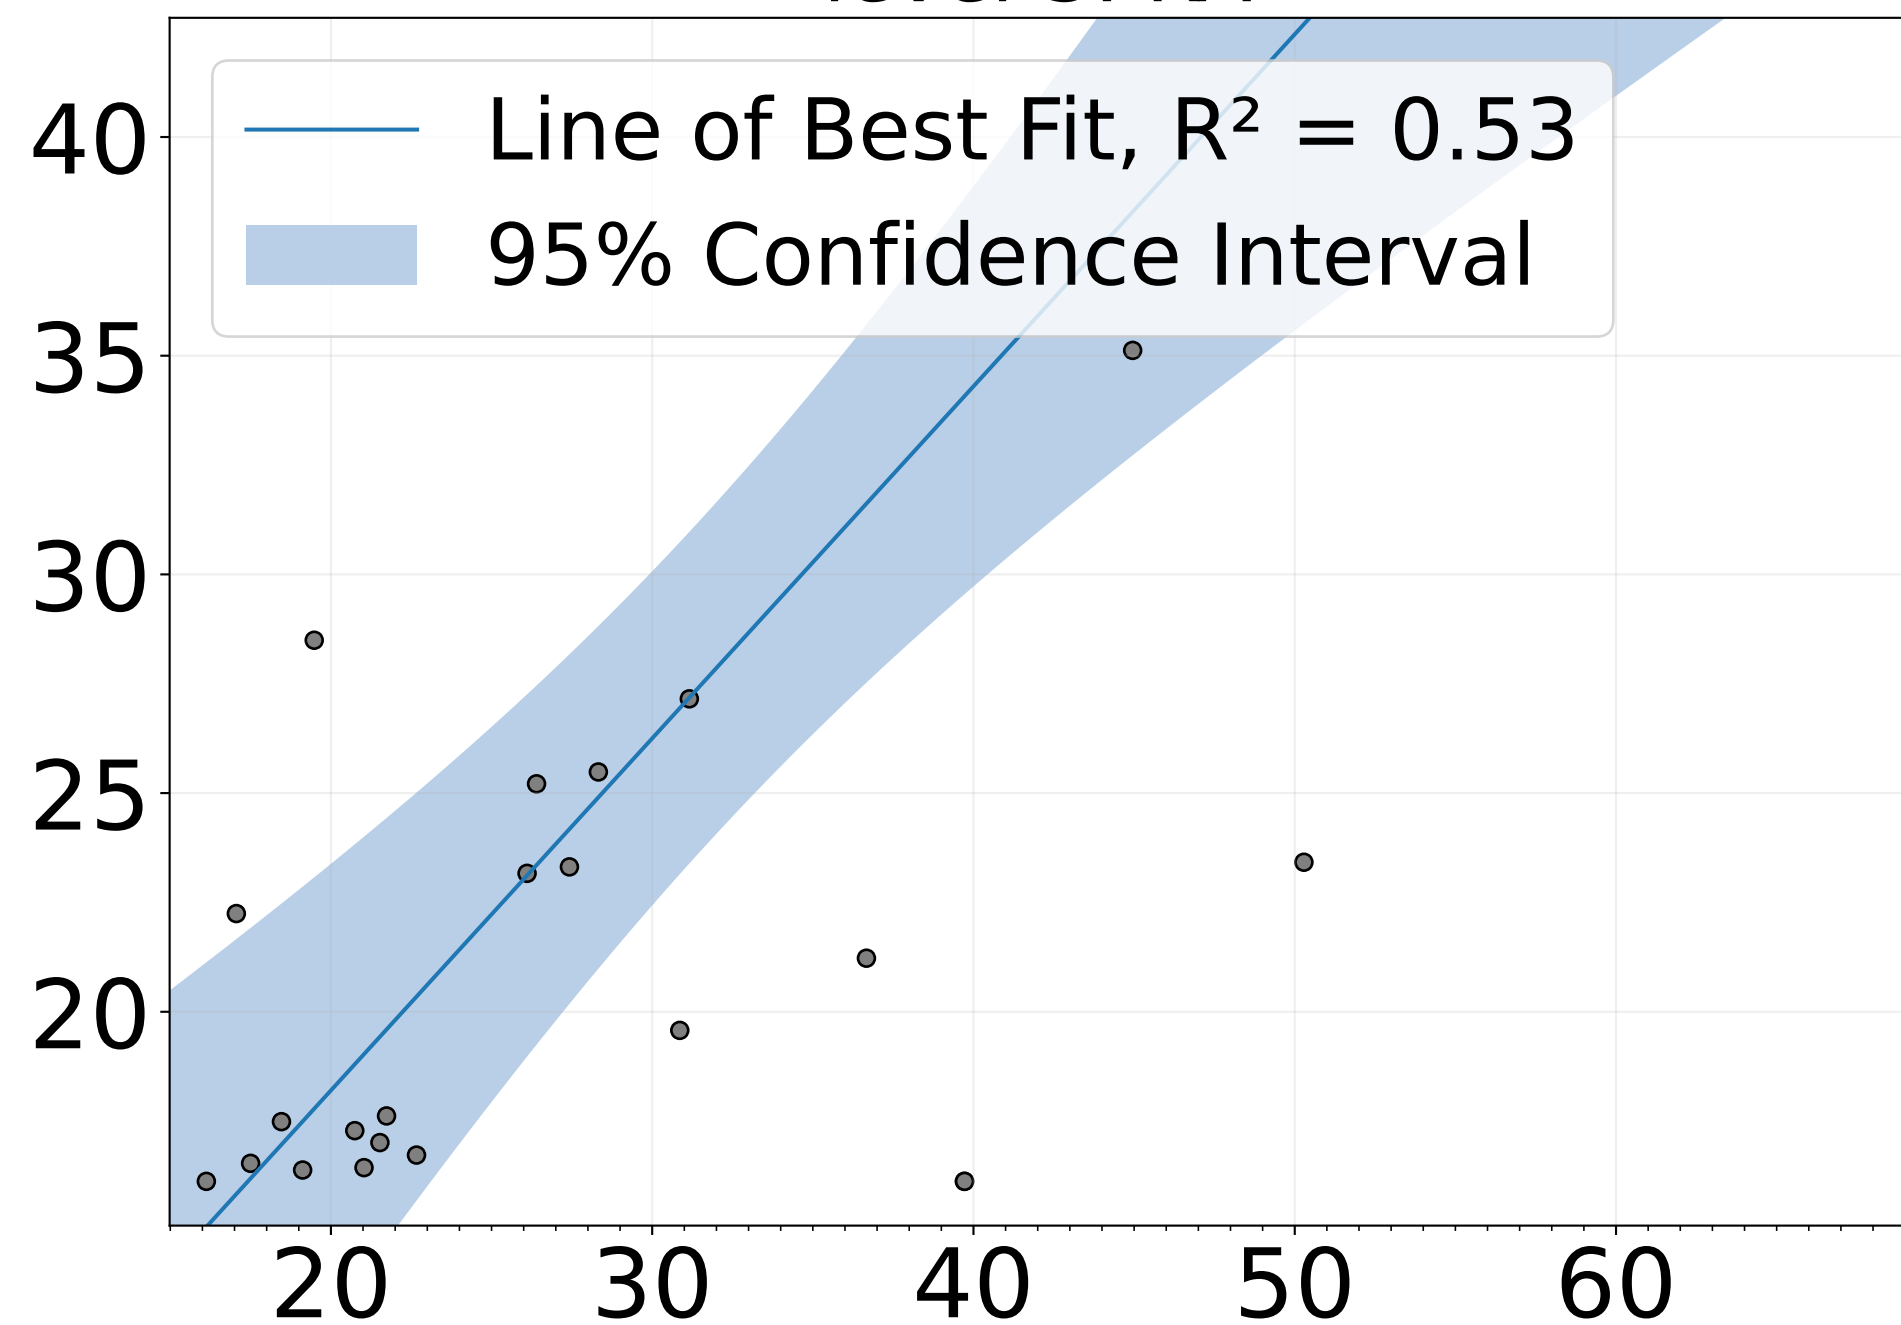

level-4: KC

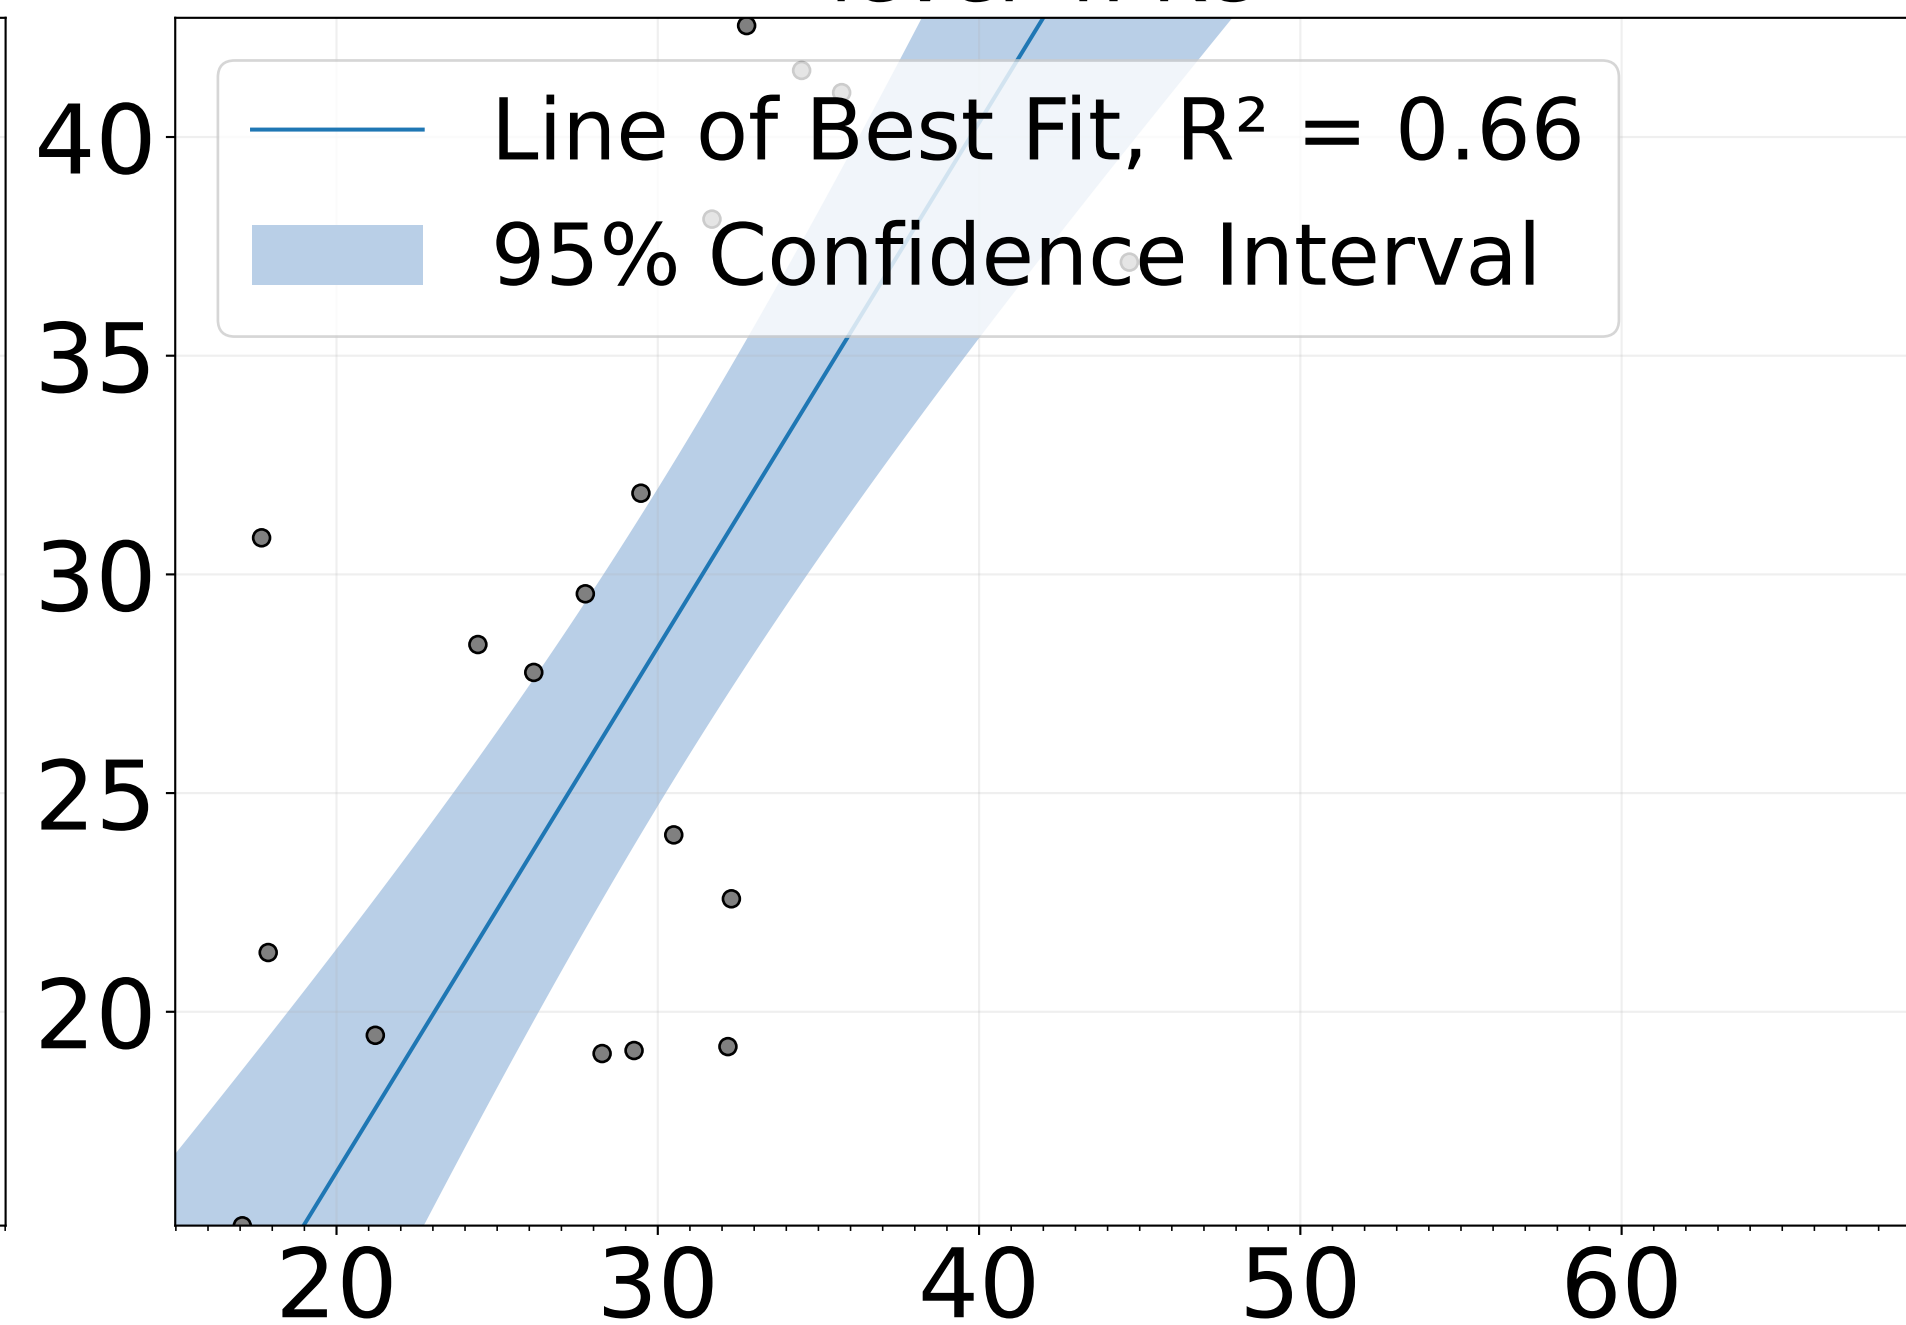

Supplement: supplementary_material [file attachment]
